# Supplementary material for: Metaviromic Characterization of Betaflexivirus Populations Associated with a Vitis cultivar Collection in South Africa
Source: MDPI journal article supplement (doi:10.3390/v15071474), 2023-06-29
Supplement: s1 [file s1]

|    |                                                 |
|----|-------------------------------------------------|
|    | OR031866 05-11 Beauty seedless GVH              |
| 93 | OR031862 04-08 Anglianico GVH                   |
| 89 | MW309674 05-09 Barrocal GVH                     |
|    | MW309673 05-08 Baroque GVH                      |
|    | OR031870 06-08 Blauer Limberger GVH             |
|    | ○ NC 040545 TT2016-3 Portugal                   |
| 99 | MW309683 23-15 Muscat St Laurent GVH            |
|    | OR031876 09-04 Cinsault Noir GVH                |
|    | OR031872 07-02 Bukettraube GVH                  |
|    | OR031875 08-09 Chardonnay GVH                   |
| 91 | OR031864 05-02 Azal branco GVH                  |
| 76 | OR031860 04-01 Assyrtiko GVH                    |
|    | MW309697 35-15 Weisser Vernatsch GVH            |
|    | MW309690 30-05 Schonberger GVH                  |
| 85 | OR031902 20-12 Mansenc Blanc GVH                |
|    | OR031907 23-12 Muscat Ottonel GVH               |
|    | OR031905 21-14 Moscatel Negro GVH               |
|    | OR031879 09-11 Colombard GVH                    |
| 97 | OR031865 05-03 Azal tinto GVH                   |
| 86 | MW309682 22-12 Muller Thurgau GVH               |
|    | OR031904 21-13 Morio Muscat GVH                 |
|    | OR031899 19-09 Madeleine Royale GVH             |
|    | OR031857 03-03 Affenthaler GVH                  |
|    | ○ MN716768 TN1 USA                              |
|    | OR031893 15-07 Grillo GVH                       |
|    | OR031916 46-13 St Laurent GVH                   |
| 95 | OR031912 34-11 Tinta Francisca GVH              |
|    | MW309687 29-01 Savagnin GVH                     |
|    | OR031882 10-13 Zante Corinthe GVH               |
|    | OR031904 21-13 Morio Muscat GVH                 |
|    | MW309702 38-10 Kuhlmann 188-2 Marechal Foch GVH |
|    | OR031914 35-09 Viura GVH                        |
|    | OR031911 33-05 Tempranillo GVH                  |
| 65 | MW309695 35-08 Vital GVH                        |
|    | MW309708 54-13 Merzling GVH                     |
|    | MW309692 33-06 Teoulier GVH                     |
|    | OR031913 35-05 Verdelho GVH                     |
| 86 | MW309676 07-15 Cataratto GVH                    |
|    | OR031883 10-15 Cape Corinth GVH                 |
|    | MW309672 04-15 Aligote GVH                      |
|    | OR031909 27-03 Reichensteiner GVH               |
| 84 | MW309680 18-02 Limberger GVH                    |
|    | OR031856 02-09 V shutteworthii GVH              |
|    | OR031869 06-04 Bourboulenc GVH                  |
| 71 | OR031858 03-12 Albanello GVH                    |
|    | OR031874 07-14 Carignan-noir GVH                |
|    | OR031859 03-15 Alicante bouchet GVH             |
|    | OR031863 04-13 Alphonse Lavallee GVH            |
|    | OR031871 06-13 Black Prince GVH                 |
|    | OR031855 02-08 V riparia GVH                    |
|    | OR031867 05-14 Black Hamburg GVH                |
|    | OR031861 04-05 Aramon blanc GVH                 |
|    | MW309699 36-06 Zinfandel GVH                    |
|    | OR031888 12-10 Emerald Riesling GVH             |
|    | OR031892 15-05 Grenache Noir GVH                |
|    | OR031884 11-02 Dauphine GVH                     |
| 65 | OR031886 12-02 Fernao Pires GVH                 |

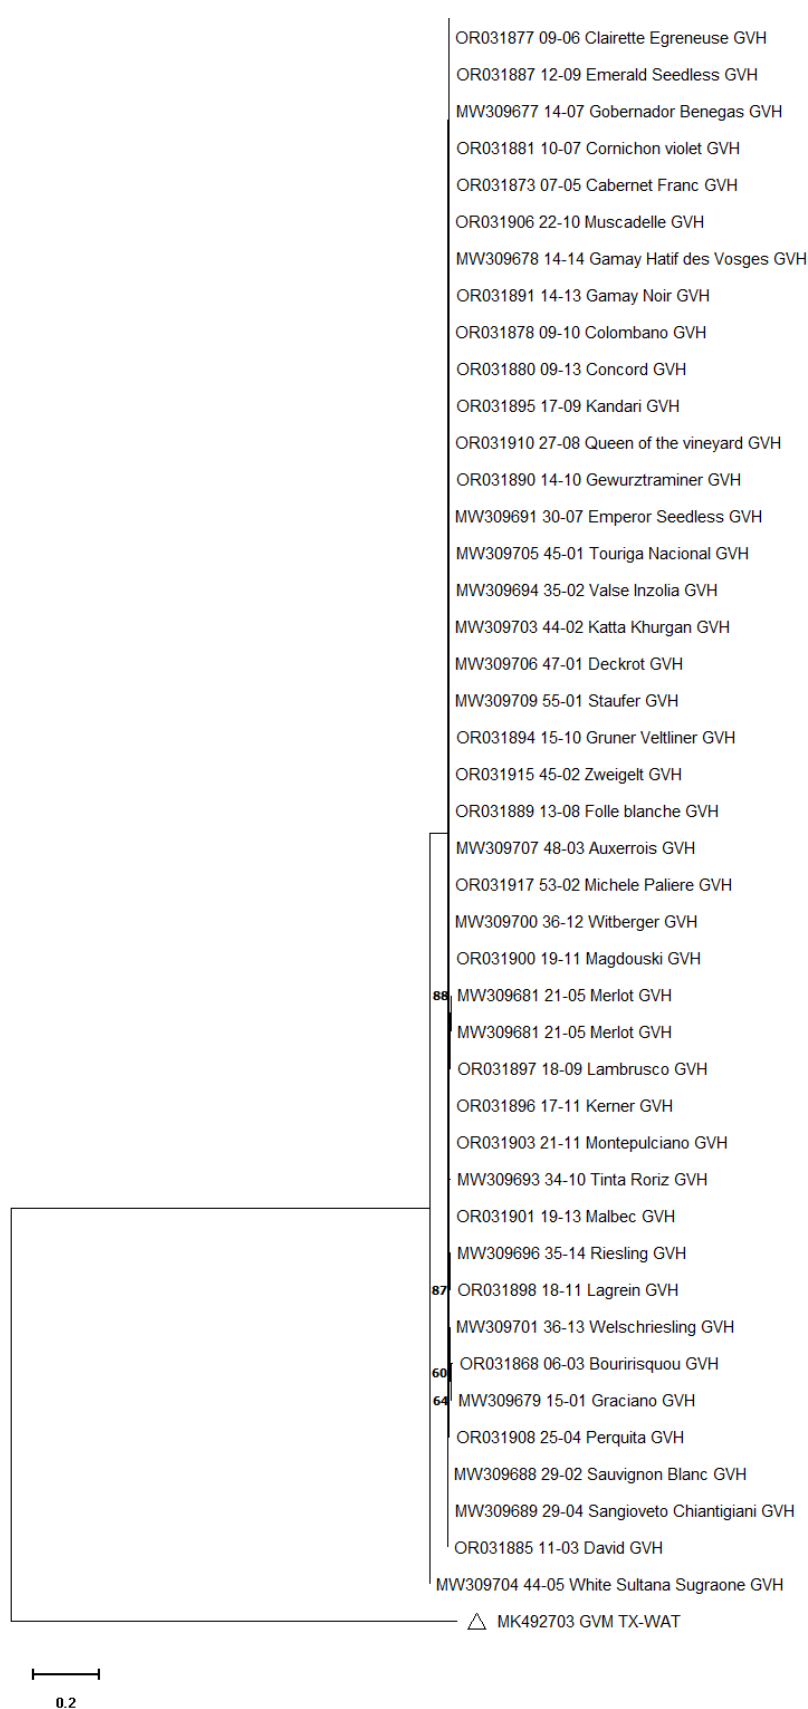

**Figure S11:** Maximum likelihood phylogeny based on the amino acid sequences of the RNA-dependant RNA polymerase (RdRp) gene of grapevine virus H (GVH) from this study together the cognate sequences from selected variants of GVH from GenBank (indicated by open circles). The cognate RdRp sequence from grapevine virus M was used as an outgroup (indicated by an open triangle). The phylogeny represents the tree with the highest log likelihood and was generated in MEGA X (Stecher et al. 2020) using the Jones-Taylor-Thornton (JTT) (Jones, W. R. Taylor, and J. M. Thornton. (1992) with gamma distribution (n=5) and invariant sites. Bootstrapping was applied (1000 replicates) and the percentage of trees in which the associated taxa clustered together is shown next to the branches. Bootstrap percentages lower than 50 are not shown.
