# Supplementary material for: Metaviromic Characterization of Betaflexivirus Populations Associated with a Vitis cultivar Collection in South Africa
Source: MDPI journal article supplement (doi:10.3390/v15071474), 2023-06-29
Supplement: s1 [file s1]

|                            |   | 1     | 2     | 3     | 4     | 5     | 6     | 7     | 8     | 9    |
|----------------------------|---|-------|-------|-------|-------|-------|-------|-------|-------|------|
| 07-05_Cabernet_Franc_GVI   | 1 |       | 7407  | 7413  | 7408  | 7409  | 7411  | 7345  | 7413  | 7412 |
| 05-08_Baroque_GVI          | 2 | 98,69 |       | 7413  | 7416  | 7419  | 7414  | 7346  | 7411  | 7418 |
| 05-06_Barbera_GVI          | 3 | 98,77 | 98,77 |       | 7446  | 7445  | 7447  | 7379  | 7445  | 7450 |
| 05-03_Azal_tinto_GVI       | 4 | 98,71 | 98,81 | 99,21 |       | 7471  | 7447  | 7381  | 7445  | 7455 |
| 04-01_Assyrtiko_GVI        | 5 | 98,72 | 98,85 | 99,20 | 99,56 |       | 7448  | 7385  | 7449  | 7456 |
| 05-04_Bacchus_GVI          | 6 | 98,75 | 98,79 | 99,23 | 99,24 | 99,25 |       | 7416  | 7456  | 7460 |
| 04-05_Aramon_blanc_GVI     | 7 | 97,87 | 97,88 | 98,32 | 98,36 | 98,45 | 98,83 |       | 7398  | 7394 |
| 06-08_Blauer_Limberger_GVI | 8 | 98,77 | 98,75 | 99,20 | 99,21 | 99,31 | 99,36 | 98,69 |       | 7468 |
| 03-05_Agostenga_GVI        | 9 | 98,76 | 98,84 | 99,27 | 99,33 | 99,35 | 99,40 | 98,52 | 99,51 |      |

Figure S14: Average nucleotide identity comparisons between the complete/near complete genomes of grapevine virus I variants from this study. The x-axis values express average nucleotide variability between variants as a percentage, while the y-axis values present the total number of nucleotide differences between each variant.
