# Supplementary material for: Metaviromic Characterization of Betaflexivirus Populations Associated with a Vitis cultivar Collection in South Africa
Source: MDPI journal article supplement (doi:10.3390/v15071474), 2023-06-29
Supplement: s1 [file s1]

|                                   |    | 1     | 2     | 3     | 4     | 5     | 6     | 7     | 8     | 9     | 10    | 11   |
|-----------------------------------|----|-------|-------|-------|-------|-------|-------|-------|-------|-------|-------|------|
| 01-04_V_champinii_GVM             | 1  |       | 5234  | 5223  | 5228  | 5222  | 5222  | 5223  | 5219  | 5222  | 5223  | 5225 |
| 21-06_Mersequera_GVM              | 2  | 70,16 |       | 7375  | 7385  | 7391  | 7294  | 7307  | 7275  | 7279  | 7283  | 7291 |
| 07-15_Cataratto_GVM               | 3  | 70,01 | 98,86 |       | 7407  | 7413  | 7296  | 7307  | 7278  | 7279  | 7283  | 7291 |
| 03-15_Alicante_bouchet_GVM        | 4  | 70,08 | 98,99 | 99,30 |       | 7423  | 7302  | 7317  | 7286  | 7290  | 7294  | 7301 |
| 11-14_Donzillinho_do_Castello_GVM | 5  | 70,00 | 99,08 | 99,38 | 99,52 |       | 7303  | 7320  | 7286  | 7290  | 7294  | 7300 |
| 36-06_Zinfandel_GVM               | 6  | 70,00 | 97,77 | 97,81 | 97,90 | 97,91 |       | 7393  | 7358  | 7362  | 7366  | 7374 |
| 28-14_Rousanne_Blanc_GVM          | 7  | 70,01 | 97,95 | 97,96 | 98,10 | 98,14 | 99,12 |       | 7416  | 7418  | 7422  | 7428 |
| 24-15_Optenhorst_GVM              | 8  | 69,96 | 97,52 | 97,61 | 97,68 | 97,68 | 98,65 | 99,42 |       | 7431  | 7435  | 7437 |
| 26-14_Pontak_GVM                  | 9  | 70,00 | 97,57 | 97,59 | 97,73 | 97,73 | 98,70 | 99,45 | 99,62 |       | 7439  | 7443 |
| 23-15_Muscat_St_Laurent_GVM       | 10 | 70,01 | 97,63 | 97,64 | 97,79 | 97,79 | 98,75 | 99,50 | 99,68 | 99,73 |       | 7445 |
| 28-13_Rotgipfler_GVM              | 11 | 70,04 | 97,73 | 97,75 | 97,88 | 97,87 | 98,86 | 99,58 | 99,71 | 99,79 | 99,81 |      |

Figure S16: Average nucleotide identity comparisons between the complete/near complete genomes of grapevine virus M variants from this study. The x-axis values express average nucleotide variability between variants as a percentage, while the y-axis values present the total number of nucleotide differences between each variant.
