# Supplementary material for: Metaviromic Characterization of Betaflexivirus Populations Associated with a Vitis cultivar Collection in South Africa
Source: MDPI journal article supplement (doi:10.3390/v15071474), 2023-06-29
Supplement: s1 [file s1]

|                                |                             | 1  | 2     | 3     | 4     | 5     | 6     | 7     | 8     | 9     | 10    | 11    | 12    | 13    | 14    | 15    | 16    | 17    | 18    | 19    | 20    | 21    | 22    | 23    | 24    | 25    | 26    | 27    | 28    |      |
|--------------------------------|-----------------------------|----|-------|-------|-------|-------|-------|-------|-------|-------|-------|-------|-------|-------|-------|-------|-------|-------|-------|-------|-------|-------|-------|-------|-------|-------|-------|-------|-------|------|
| 05-10_Bastardo_de_Castello_GVE | 02-01_V_flexuisa_GVE        | 1  |       | 5205  | 5131  | 5208  | 5210  | 5206  | 5213  | 5211  | 5212  | 5165  | 5206  | 5060  | 5207  | 5167  | 4876  | 5212  | 5160  | 5208  | 5209  | 5210  | 5174  | 5191  | 5205  | 5213  | 5205  | 5208  | 5196  | 5195 |
|                                | 15-14_Hebron_GVE            | 2  | 68,50 |       | 7384  | 7443  | 7446  | 7448  | 7453  | 7448  | 7442  | 7395  | 7445  | 7287  | 7449  | 7413  | 7051  | 7449  | 7394  | 7450  | 7454  | 7453  | 7421  | 7389  | 7393  | 7399  | 7396  | 7386  | 7388  | 7393 |
|                                | 16-15_Heroldrebe_GVE        | 3  | 67,52 | 97,59 |       | 7427  | 7437  | 7443  | 7443  | 7445  | 7437  | 7435  | 7440  | 7366  | 7444  | 7444  | 7130  | 7436  | 7435  | 7445  | 7442  | 7440  | 7445  | 7309  | 7321  | 7319  | 7322  | 7308  | 7314  | 7322 |
|                                | 30-05_Schonberger_GVE       | 4  | 68,54 | 98,37 | 98,21 |       | 7513  | 7525  | 7530  | 7523  | 7525  | 7474  | 7522  | 7362  | 7524  | 7492  | 7129  | 7524  | 7473  | 7529  | 7528  | 7526  | 7500  | 7391  | 7404  | 7400  | 7403  | 7394  | 7391  | 7397 |
|                                | 14-13_Gamay_Noir_GVE        | 5  | 68,55 | 98,35 | 98,23 | 99,23 |       | 7536  | 7536  | 7539  | 7529  | 7476  | 7529  | 7370  | 7535  | 7497  | 7134  | 7532  | 7471  | 7528  | 7534  | 7534  | 7503  | 7378  | 7387  | 7400  | 7395  | 7383  | 7383  | 7388 |
|                                | 28-10_Rotberger_GVE         | 6  | 68,51 | 98,43 | 98,36 | 99,44 | 99,52 |       | 7551  | 7554  | 7538  | 7484  | 7541  | 7380  | 7547  | 7509  | 7146  | 7543  | 7483  | 7542  | 7545  | 7543  | 7515  | 7384  | 7391  | 7400  | 7399  | 7387  | 7387  | 7394 |
|                                | 30-08_Semillon_GVE          | 7  | 68,60 | 98,45 | 98,32 | 99,47 | 99,54 | 99,74 |       | 7556  | 7541  | 7486  | 7540  | 7380  | 7546  | 7510  | 7146  | 7546  | 7487  | 7545  | 7547  | 7548  | 7514  | 7385  | 7398  | 7407  | 7402  | 7390  | 7389  | 7399 |
|                                | 25-09_Poulsaid_GVE          | 8  | 68,57 | 98,38 | 98,34 | 99,37 | 99,58 | 99,76 | 99,80 |       | 7541  | 7484  | 7541  | 7382  | 7547  | 7509  | 7146  | 7544  | 7485  | 7542  | 7546  | 7548  | 7513  | 7383  | 7391  | 7404  | 7400  | 7385  | 7386  | 7394 |
|                                | 08-09_Chardonnay_GVE        | 9  | 68,59 | 98,31 | 98,24 | 99,41 | 99,45 | 99,56 | 99,62 | 99,60 |       | 7476  | 7533  | 7372  | 7543  | 7501  | 7140  | 7535  | 7473  | 7534  | 7536  | 7537  | 7503  | 7377  | 7386  | 7398  | 7393  | 7383  | 7380  | 7388 |
|                                | 07-15_Cataratto_GVE         | 10 | 67,97 | 97,74 | 98,97 | 98,84 | 98,75 | 98,90 | 98,89 | 98,85 | 98,76 |       | 7485  | 7372  | 7485  | 7485  | 7138  | 7483  | 7481  | 7488  | 7489  | 7487  | 7492  | 7335  | 7344  | 7345  | 7348  | 7336  | 7337  | 7345 |
|                                | 04-15_Aligote_GVE           | 11 | 68,51 | 98,40 | 98,36 | 99,44 | 99,45 | 99,66 | 99,60 | 99,60 | 99,51 | 98,96 |       | 7385  | 7548  | 7514  | 7152  | 7536  | 7482  | 7537  | 7542  | 7540  | 7512  | 7381  | 7394  | 7399  | 7400  | 7386  | 7387  | 7393 |
|                                | 11-05_Delight_GVE           | 12 | 66,59 | 96,31 | 98,46 | 97,36 | 97,35 | 97,53 | 97,49 | 97,50 | 97,38 | 98,14 | 97,63 |       | 7387  | 7393  | 7153  | 7375  | 7374  | 7380  | 7379  | 7379  | 7382  | 7224  | 7233  | 7237  | 7240  | 7225  | 7230  | 7239 |
|                                | 05-15_Black_Monukka_GVE     | 13 | 68,52 | 98,45 | 98,39 | 99,44 | 99,52 | 99,74 | 99,68 | 99,68 | 99,64 | 98,93 | 99,76 | 97,63 |       | 7516  | 7155  | 7540  | 7484  | 7541  | 7546  | 7544  | 7514  | 7383  | 7394  | 7401  | 7400  | 7388  | 7391  | 7397 |
|                                | 05-14_Black_Hamburg_GVE     | 14 | 68,00 | 97,98 | 98,88 | 99,07 | 99,02 | 99,23 | 99,21 | 99,18 | 99,09 | 99,43 | 99,34 | 98,21 | 99,34 |       | 7156  | 7502  | 7486  | 7511  | 7508  | 7506  | 7511  | 7349  | 7360  | 7363  | 7366  | 7354  | 7355  | 7363 |
|                                | 17-07_Kadarka_GVE           | 15 | 64,17 | 93,19 | 95,31 | 94,27 | 94,23 | 94,44 | 94,40 | 94,39 | 94,32 | 95,02 | 94,55 | 96,62 | 94,57 | 95,06 |       | 7139  | 7138  | 7146  | 7145  | 7143  | 7148  | 6992  | 7001  | 7008  | 7011  | 6996  | 7002  | 7009 |
|                                | 16-09_Huxelrebe_GVE         | 16 | 68,57 | 98,38 | 98,20 | 99,37 | 99,47 | 99,60 | 99,66 | 99,63 | 99,51 | 98,82 | 99,52 | 97,40 | 99,58 | 99,08 | 94,28 |       | 7502  | 7539  | 7545  | 7552  | 7516  | 7383  | 7392  | 7403  | 7398  | 7386  | 7386  | 7393 |
|                                | 18-11_Lagrein_GVE           | 17 | 67,90 | 97,73 | 98,99 | 98,82 | 98,68 | 98,89 | 98,90 | 98,86 | 98,72 | 99,59 | 98,92 | 98,18 | 98,92 | 99,44 | 95,03 | 99,08 |       | 7489  | 7488  | 7492  | 7493  | 7330  | 7341  | 7344  | 7347  | 7333  | 7334  | 7342 |
|                                | 23-15_Muscat_St_Laurent_GVE | 18 | 68,54 | 98,47 | 98,45 | 99,56 | 99,43 | 99,67 | 99,67 | 99,62 | 99,52 | 99,02 | 99,64 | 97,59 | 99,67 | 99,33 | 94,50 | 99,56 | 99,03 |       | 7543  | 7541  | 7517  | 7388  | 7398  | 7398  | 7401  | 7391  | 7390  | 7401 |
|                                | 31-11_Seneca_GVE            | 19 | 68,55 | 98,51 | 98,35 | 99,48 | 99,51 | 99,70 | 99,70 | 99,67 | 99,55 | 98,97 | 99,67 | 97,52 | 99,72 | 99,22 | 94,42 | 99,64 | 98,96 | 99,68 |       | 7549  | 7518  | 7387  | 7397  | 7404  | 7402  | 7389  | 7392  | 7397 |
|                                | 10-04_Crouchen_blanc_GVE    | 20 | 68,56 | 98,45 | 98,28 | 99,42 | 99,51 | 99,63 | 99,71 | 99,70 | 99,56 | 98,90 | 99,60 | 97,48 | 99,66 | 99,15 | 94,36 | 99,74 | 98,97 | 99,62 | 99,72 |       | 7520  | 7383  | 7397  | 7405  | 7400  | 7388  | 7389  | 7395 |
|                                | 03-13_Alden_GVE             | 21 | 68,09 | 98,08 | 98,86 | 99,18 | 99,10 | 99,31 | 99,26 | 99,23 | 99,11 | 99,48 | 99,31 | 98,02 | 99,31 | 99,73 | 94,91 | 99,26 | 99,50 | 99,40 | 99,35 | 99,34 |       | 7359  | 7368  | 7369  | 7372  | 7362  | 7362  | 7369 |
|                                | 54-13_Merzling_GVE          | 22 | 68,31 | 97,66 | 96,65 | 97,74 | 97,45 | 97,58 | 97,56 | 97,52 | 97,45 | 97,00 | 97,58 | 95,53 | 97,58 | 97,18 | 92,46 | 97,50 | 96,93 | 97,70 | 97,62 | 97,53 | 97,32 |       | 7400  | 7410  | 7410  | 7379  | 7372  | 7386 |
|                                | 44-02_Katta_Khurgan_GVE     | 23 | 68,50 | 97,71 | 96,81 | 97,91 | 97,57 | 97,67 | 97,73 | 97,62 | 97,57 | 97,12 | 97,75 | 95,65 | 97,73 | 97,33 | 92,58 | 97,62 | 97,08 | 97,83 | 97,75 | 97,71 | 97,43 | 97,86 |       | 7411  | 7410  | 7389  | 7378  | 7404 |
|                                | 03-03_Affenthaler_GVE       | 24 | 68,60 | 97,74 | 96,68 | 97,75 | 97,74 | 97,74 | 97,85 | 97,79 | 97,73 | 97,03 | 97,74 | 95,60 | 97,77 | 97,27 | 92,58 | 97,77 | 97,01 | 97,73 | 97,81 | 97,82 | 97,34 | 97,89 | 97,90 |       | 7554  | 7390  | 7393  | 7396 |
|                                | 10-07_Cornichon_violet_GVE  | 25 | 68,50 | 97,75 | 96,83 | 97,90 | 97,68 | 97,78 | 97,78 | 97,74 | 97,66 | 97,17 | 97,83 | 95,74 | 97,81 | 97,41 | 92,71 | 97,70 | 97,16 | 97,87 | 97,82 | 97,75 | 97,49 | 97,99 | 97,99 | 99,79 |       | 7389  | 7392  | 7395 |
|                                | 11-03_David_GVE             | 26 | 68,54 | 97,62 | 96,64 | 97,78 | 97,52 | 97,62 | 97,62 | 97,54 | 97,53 | 97,01 | 97,65 | 95,54 | 97,65 | 97,25 | 92,52 | 97,54 | 96,97 | 97,74 | 97,65 | 97,60 | 97,36 | 97,58 | 97,71 | 97,62 | 97,71 |       | 7394  | 7391 |
|                                |                             | 27 | 68,38 | 97,65 | 96,72 | 97,74 | 97,52 | 97,62 | 97,61 | 97,56 | 97,49 | 97,02 | 97,66 | 95,61 | 97,69 | 97,26 | 92,59 | 97,54 | 96,98 | 97,73 | 97,69 | 97,61 | 97,36 | 97,49 | 97,57 | 97,66 | 97,75 | 97,78 |       | 7413 |
|                                |                             | 28 | 68,36 | 97,71 | 96,83 | 97,82 | 97,58 | 97,71 | 97,74 | 97,66 | 97,60 | 97,13 | 97,74 | 95,73 | 97,77 | 97,37 | 92,69 | 97,64 | 97,09 | 97,87 | 97,75 | 97,69 | 97,45 | 97,67 | 97,91 | 97,70 | 97,79 | 97,74 | 98,03 |      |

**Figure S8: Average nucleotide identity comparisons between the complete/near complete genomes of grapevine virus E variants from this study. The x-axis values express average nucleotide variability between variants as a percentage, while the y-axis values present the total number of nucleotide differences between each variant.**
