# Supplementary material for: Metaviromic Characterization of Betaflexivirus Populations Associated with a Vitis cultivar Collection in South Africa
Source: MDPI journal article supplement (doi:10.3390/v15071474), 2023-06-29
Supplement: s1 [file s1]

|                                     |    | 1     | 2     | 3     | 4     | 5     | 6     | 7     | 8     | 9     | 10    | 11    | 12    | 13    | 14    | 15    | 16    | 17    | 18    | 19    | 20    | 21    | 22    | 23    | 24    | 25    | 26    | 27    | 28    | 29    | 30    | 31    | 32    | 33   | 34   | 35   | 36   |
|-------------------------------------|----|-------|-------|-------|-------|-------|-------|-------|-------|-------|-------|-------|-------|-------|-------|-------|-------|-------|-------|-------|-------|-------|-------|-------|-------|-------|-------|-------|-------|-------|-------|-------|-------|------|------|------|------|
| 55-01_Stauber_GVA                   | 1  |       | 5615  | 5644  | 5618  | 5410  | 5620  | 5425  | 5269  | 5680  | 5629  | 5630  | 5629  | 5641  | 5610  | 5606  | 5631  | 5648  | 5658  | 5661  | 5616  | 4446  | 5181  | 5206  | 4447  | 5192  | 5179  | 5186  | 5183  | 5190  | 5189  | 5190  | 4368  | 4322 | 5034 | 5136 | 5072 |
| 12-02_Fernao_Pires_GVA              | 2  | 76,32 |       | 7303  | 7304  | 5470  | 5669  | 5471  | 5290  | 5710  | 5699  | 5679  | 5704  | 5709  | 5663  | 5683  | 5701  | 5687  | 5616  | 5700  | 5724  | 4405  | 5169  | 5166  | 4404  | 5199  | 5204  | 5202  | 5213  | 5206  | 5217  | 5198  | 4368  | 4351 | 5056 | 5156 | 5081 |
| 20-12_Mansenc_Blanc_GVA             | 3  | 76,72 | 99,27 |       | 7307  | 5469  | 5678  | 5470  | 5290  | 5708  | 5699  | 5677  | 5679  | 5684  | 5643  | 5679  | 5702  | 5693  | 5620  | 5693  | 5719  | 4405  | 5154  | 5156  | 4404  | 5190  | 5196  | 5188  | 5198  | 5198  | 5204  | 5190  | 4368  | 4351 | 5049 | 5145 | 5077 |
| 06-08_Blauer_Limberger_GVA          | 4  | 76,36 | 99,28 | 99,32 |       | 5470  | 5680  | 5471  | 5297  | 5703  | 5695  | 5677  | 5679  | 5685  | 5639  | 5684  | 5702  | 5688  | 5616  | 5692  | 5717  | 4405  | 5152  | 5157  | 4404  | 5180  | 5184  | 5181  | 5192  | 5186  | 5197  | 5180  | 4368  | 4351 | 5038 | 5140 | 5074 |
| 11-05_Delight_GVA2                  | 5  | 73,58 | 74,36 | 74,34 | 74,36 |       | 5460  | 5467  | 5318  | 5500  | 5503  | 5514  | 5543  | 5558  | 5519  | 5518  | 5528  | 5485  | 5524  | 5521  | 5541  | 4412  | 4956  | 4953  | 4382  | 4951  | 4936  | 4959  | 4950  | 4953  | 4951  | 4965  | 4357  | 4335 | 4826 | 4914 | 4920 |
| 33-06_Teoulery_GVA-2                | 6  | 76,43 | 77,06 | 77,18 | 77,21 | 74,28 |       | 5570  | 5367  | 5779  | 5756  | 5740  | 5805  | 5809  | 5768  | 5814  | 5749  | 5739  | 5805  | 5773  | 5784  | 4439  | 5171  | 5185  | 4445  | 5195  | 5190  | 5217  | 5217  | 5212  | 5200  | 5210  | 4399  | 4356 | 5047 | 5121 | 5094 |
| 11-05_Delight_GVA                   | 7  | 73,77 | 74,37 | 74,35 | 74,37 | 76,87 | 75,76 |       | 5526  | 5703  | 5627  | 5658  | 5657  | 5668  | 5666  | 5710  | 5660  | 5670  | 5702  | 5703  | 5682  | 4403  | 4955  | 4982  | 4414  | 4999  | 4990  | 5018  | 5012  | 5011  | 4983  | 4998  | 4371  | 4307 | 4839 | 4952 | 4948 |
| 52-06_Jurancon_Noir                 | 8  | 71,67 | 71,91 | 71,90 | 72,01 | 74,79 | 73,01 | 77,70 |       | 5739  | 5683  | 5680  | 5679  | 5683  | 5747  | 5690  | 5702  | 5711  | 5683  | 5688  | 5719  | 4365  | 4858  | 4845  | 4339  | 4845  | 4827  | 4846  | 4843  | 4852  | 4830  | 4834  | 4349  | 4257 | 4766 | 4823 | 4813 |
| 03-04_Agawam_GVA                    | 9  | 77,25 | 77,61 | 77,59 | 77,52 | 74,80 | 78,59 | 77,55 | 78,05 |       | 6119  | 6165  | 6148  | 6157  | 6159  | 6193  | 6148  | 6211  | 6210  | 6193  | 6211  | 4411  | 5180  | 5156  | 4418  | 5152  | 5150  | 5171  | 5168  | 5172  | 5185  | 5163  | 4366  | 4294 | 5015 | 5164 | 5088 |
| 48-09_Tinta_Amarela_GVA-2           | 10 | 76,55 | 77,46 | 77,46 | 77,41 | 74,84 | 78,28 | 76,52 | 77,29 | 83,22 |       | 6189  | 6176  | 6187  | 6151  | 6172  | 6189  | 6223  | 6205  | 6196  | 6219  | 4459  | 5195  | 5212  | 4436  | 5218  | 5202  | 5213  | 5217  | 5218  | 5222  | 5194  | 4381  | 4301 | 5017 | 5131 | 5054 |
| 17-07_Kadarka_GVA                   | 11 | 76,58 | 77,19 | 77,16 | 77,16 | 74,99 | 78,06 | 76,94 | 77,26 | 83,84 | 84,17 |       | 6159  | 6173  | 6226  | 6222  | 6196  | 6189  | 6201  | 6194  | 6243  | 4423  | 5173  | 5194  | 4410  | 5176  | 5160  | 5178  | 5173  | 5174  | 5173  | 5178  | 4381  | 4334 | 5076 | 5195 | 5125 |
| 07-02_Bukettraube-GVA               | 12 | 76,55 | 77,53 | 77,19 | 77,19 | 75,38 | 78,95 | 76,92 | 77,23 | 83,61 | 83,99 | 83,76 |       | 7292  | 6211  | 6199  | 6248  | 6254  | 6227  | 6225  | 6267  | 4446  | 5188  | 5166  | 4424  | 5200  | 5166  | 5191  | 5192  | 5189  | 5195  | 5203  | 4412  | 4347 | 5060 | 5174 | 5099 |
| 45-07_Red_Globe_GVA-2               | 13 | 76,72 | 77,60 | 77,26 | 77,27 | 75,59 | 79,00 | 77,07 | 77,29 | 83,73 | 84,14 | 83,95 | 99,17 |       | 6218  | 6215  | 6250  | 6260  | 6240  | 6236  | 6278  | 4445  | 5188  | 5161  | 4428  | 5203  | 5167  | 5194  | 5195  | 5190  | 5194  | 5200  | 4411  | 4348 | 5062 | 5175 | 5099 |
| 26-02_Petit_Sirah_Durif_GVA         | 14 | 76,31 | 76,97 | 76,70 | 76,65 | 75,24 | 78,45 | 77,24 | 78,36 | 83,76 | 83,65 | 84,68 | 84,47 | 84,56 |       | 6310  | 6208  | 6272  | 6213  | 6241  | 6269  | 4440  | 5184  | 5152  | 4430  | 5204  | 5202  | 5202  | 5200  | 5206  | 5217  | 5194  | 4425  | 4335 | 5030 | 5145 | 5083 |
| 07-15_Cataratto_GVA                 | 15 | 76,23 | 77,24 | 77,18 | 77,25 | 75,03 | 79,06 | 77,63 | 77,37 | 84,21 | 83,93 | 84,61 | 84,29 | 84,51 | 85,80 |       | 6183  | 6284  | 6262  | 6258  | 6293  | 4429  | 5164  | 5151  | 4430  | 5195  | 5179  | 5189  | 5188  | 5192  | 5183  | 5198  | 4414  | 4348 | 5025 | 5151 | 5079 |
| 20-04_Mourvedre_GVA2                | 16 | 76,52 | 77,46 | 77,47 | 77,47 | 75,12 | 78,12 | 76,91 | 77,48 | 83,54 | 84,10 | 84,20 | 84,90 | 84,93 | 84,36 | 84,01 |       | 6247  | 6281  | 6254  | 6264  | 4453  | 5210  | 5207  | 4437  | 5206  | 5185  | 5205  | 5207  | 5197  | 5208  | 5203  | 4402  | 4330 | 5025 | 5172 | 5067 |
| 22-15_Mourisco_de_Semente_GVA       | 17 | 76,51 | 77,03 | 77,11 | 77,04 | 74,30 | 77,74 | 76,81 | 77,36 | 84,14 | 84,30 | 83,84 | 84,72 | 84,80 | 84,96 | 85,11 | 84,62 |       | 6273  | 6308  | 6273  | 4427  | 5184  | 5166  | 4393  | 5189  | 5163  | 5180  | 5181  | 5181  | 5206  | 5189  | 4410  | 4333 | 5069 | 5138 | 5096 |
| 23-01_Muscat_d_Alexandrie_blanc_GVA | 18 | 76,93 | 76,34 | 76,39 | 76,34 | 75,11 | 78,93 | 77,53 | 77,27 | 84,43 | 84,36 | 84,31 | 84,66 | 84,84 | 84,47 | 85,13 | 85,35 | 84,98 |       | 6311  | 6294  | 4438  | 5173  | 5169  | 4431  | 5171  | 5168  | 5180  | 5174  | 5178  | 5182  | 5165  | 4424  | 4325 | 5008 | 5149 | 5071 |
| 18-02_Limberger_GVA                 | 19 | 77,00 | 77,48 | 77,38 | 77,37 | 75,08 | 78,51 | 77,55 | 77,37 | 84,22 | 84,26 | 84,25 | 84,66 | 84,81 | 84,89 | 85,10 | 84,98 | 85,45 | 85,81 |       | 6551  | 4433  | 5196  | 5161  | 4414  | 5187  | 5177  | 5206  | 5200  | 5194  | 5180  | 5191  | 4422  | 4331 | 5037 | 5157 | 5091 |
| 10-06_Cornifesto_GVA                | 20 | 76,38 | 77,80 | 77,74 | 77,71 | 75,36 | 78,66 | 77,26 | 77,78 | 84,47 | 84,58 | 84,90 | 85,23 | 85,38 | 85,26 | 85,57 | 85,12 | 84,98 | 85,57 | 89,09 |       | 4462  | 5219  | 5141  | 4412  | 5176  | 5170  | 5192  | 5185  | 5187  | 5203  | 5194  | 4431  | 4336 | 5023 | 5142 | 5113 |
| 14-13_Gamay_Noir_GVA                | 21 | 60,37 | 59,79 | 59,78 | 59,79 | 61,94 | 60,29 | 61,81 | 61,84 | 59,89 | 60,54 | 60,06 | 60,37 | 60,35 | 60,44 | 60,13 | 60,41 | 59,87 | 60,24 | 60,20 | 60,58 |       | 6344  | 5307  | 5175  | 5287  | 5274  | 5294  | 5302  | 5285  | 5268  | 5252  | 4887  | 4838 | 4835 | 4957 | 4950 |
| 23-15_Muscat_St_Laurent_GVA         | 22 | 70,33 | 70,14 | 69,93 | 69,91 | 67,29 | 70,19 | 67,28 | 65,96 | 70,31 | 70,52 | 70,22 | 70,42 | 70,42 | 70,37 | 70,09 | 70,67 | 70,10 | 70,21 | 70,53 | 70,84 | 86,21 |       | 6182  | 5176  | 6178  | 6149  | 6180  | 6199  | 6166  | 6153  | 6134  | 4893  | 4847 | 5656 | 5773 | 5682 |
| 03-03_Affenthaler_GVA               | 23 | 70,68 | 70,09 | 69,96 | 69,97 | 67,26 | 70,39 | 67,64 | 65,79 | 70,00 | 70,76 | 70,51 | 70,13 | 70,07 | 69,94 | 69,92 | 70,63 | 69,86 | 70,15 | 70,07 | 69,79 | 72,10 | 83,97 |       | 5270  | 6165  | 6150  | 6174  | 6167  | 6172  | 6193  | 6148  | 4877  | 4890 | 5682 | 5794 | 5739 |
| 05-04_Bacchus_GVA                   | 24 | 60,38 | 59,77 | 59,76 | 59,77 | 61,52 | 60,37 | 61,96 | 61,46 | 59,99 | 60,23 | 59,88 | 60,07 | 60,12 | 60,30 | 60,14 | 60,20 | 59,41 | 60,15 | 59,93 | 59,90 | 80,32 | 70,31 | 71,59 |       | 5415  | 5442  | 5454  | 5453  | 5460  | 5460  | 5432  | 4881  | 4825 | 4811 | 4924 | 4898 |
| 03-15_Alicante_bouchet_GVA          | 25 | 70,49 | 70,54 | 70,42 | 70,28 | 67,23 | 70,53 | 67,88 | 65,79 | 69,94 | 70,84 | 70,27 | 70,59 | 70,64 | 70,65 | 70,52 | 70,62 | 70,17 | 70,18 | 70,42 | 70,27 | 71,82 | 83,92 | 83,75 | 73,56 |       | 7063  | 7131  | 7133  | 7129  | 6862  | 6853  | 4892  | 4841 | 5672 | 5799 | 5711 |
| 21-10_Mondeuse_Noire_GVA            | 26 | 70,31 | 70,61 | 70,50 | 70,34 | 67,03 | 70,46 | 67,75 | 65,55 | 69,92 | 70,62 | 70,05 | 70,13 | 70,15 | 70,62 | 70,30 | 70,33 | 69,82 | 70,14 | 70,28 | 70,19 | 71,65 | 83,52 | 83,55 | 73,93 | 95,95 |       | 7203  | 7232  | 7271  | 6894  | 6863  | 4903  | 4841 | 5662 | 5784 | 5707 |
| 11-03_David_GVA                     | 27 | 70,40 | 70,58 | 70,39 | 70,30 | 67,34 | 70,83 | 68,13 | 65,81 | 70,20 | 70,77 | 70,30 | 70,47 | 70,51 | 70,62 | 70,44 | 70,60 | 70,05 | 70,30 | 70,68 | 70,49 | 71,92 | 83,94 | 83,87 | 74,09 | 96,88 | 97,85 |       | 7302  | 7291  | 6871  | 6860  | 4913  | 4845 | 5680 | 5806 | 5717 |
| 21-03_Mazuelo_Nero_GVA              | 28 | 70,36 | 70,73 | 70,53 | 70,45 | 67,22 | 70,83 | 68,05 | 65,77 | 70,16 | 70,83 | 70,23 | 70,49 | 70,53 | 70,59 | 70,42 | 70,63 | 70,06 | 70,22 | 70,59 | 70,39 | 72,03 | 84,20 | 83,78 | 74,08 | 96,90 | 98,25 | 99,20 |       | 7322  | 6888  | 6871  | 4915  | 4845 | 5683 | 5809 | 5712 |
| 33-06_Teoulery_GVA                  | 29 | 70,46 | 70,64 | 70,53 | 70,37 | 67,26 | 70,76 | 68,04 | 65,89 | 70,21 | 70,84 | 70,24 | 70,45 | 70,46 | 70,68 | 70,48 | 70,50 | 70,06 | 70,28 | 70,51 | 70,42 | 71,80 | 83,75 | 83,85 | 74,17 | 96,85 | 98,78 | 99,05 | 99,47 |       | 6906  | 6892  | 4918  | 4850 | 5678 | 5804 | 5718 |
| 45-07_Red_Globe_GVA                 | 30 | 70,45 | 70,79 | 70,61 | 70,52 | 67,23 | 70,59 | 67,66 | 65,59 | 70,39 | 70,89 | 70,23 | 70,53 | 70,51 | 70,83 | 70,35 | 70,65 | 70,40 | 70,33 | 70,32 | 70,64 | 71,57 | 83,58 | 84,13 | 74,17 | 93,22 | 93,66 | 93,34 | 93,57 | 93,82 |       | 6911  | 4885  | 4856 | 5673 | 5790 | 5693 |
| 20-04_Mourvedre_GVA                 | 31 | 70,46 | 70,53 | 70,42 | 70,28 | 67,42 | 70,73 | 67,86 | 65,64 | 70,09 | 70,51 | 70,30 | 70,64 | 70,59 | 70,51 | 70,56 | 70,58 | 70,17 | 70,10 | 70,47 | 70,51 | 71,35 | 83,32 | 83,52 | 73,79 | 93,10 | 93,23 | 93,19 | 93,34 | 93,63 | 93,89 |       | 4874  | 4835 | 5645 | 5782 | 5679 |
| 04-05_Aramon_blanc_GVA              | 32 | 59,37 | 59,35 | 59,34 | 59,35 | 61,24 | 59,81 | 61,42 | 61,67 | 59,34 | 59,55 | 59,55 | 59,97 | 59,96 | 60,29 | 59,99 | 59,79 | 59,71 | 60,12 | 60,11 | 60,23 | 75,85 | 66,46 | 66,25 | 76,15 | 66,46 | 66,61 | 66,74 | 66,77 | 66,81 | 66,36 | 66,21 |       | 5012 | 4968 | 5062 | 5045 |
| 10-15_Cape_Corinth_GVA              | 33 | 58,75 | 59,12 | 59,11 | 59,12 | 60,93 | 59,23 | 60,53 | 60,37 | 58,37 | 58,46 | 58,91 | 59,09 | 59,10 | 59,07 | 59,09 | 58,81 | 58,67 | 58,77 | 58,87 | 58,94 | 75,09 | 65,84 | 66,43 | 75,27 | 65,77 | 65,77 | 65,82 | 65,82 | 65,89 | 65,97 | 65,68 | 78,51 |      | 5114 | 5241 | 5223 |
| 09-06_Clairette_Egrenouse_GVA       | 34 | 68,42 | 68,68 | 68,58 | 68,43 | 65,   |       |       |       |       |       |       |       |       |       |       |       |       |       |       |       |       |       |       |       |       |       |       |       |       |       |       |       |      |      |      |      |
